1 **Magnesium suppresses defects in the formation of 70S ribosomes as well as**  
2 **in sporulation caused by lack of several individual ribosomal proteins.**

3

4 Genki Akanuma,<sup>a,b\*</sup> Kotaro Yamazaki,<sup>a</sup> Yuma Yagishi,<sup>a</sup> Yuka Iizuka,<sup>c</sup> Morio Ishizuka,<sup>c</sup> Fujio  
5 Kawamura,<sup>a</sup> and Yasuyuki Kato-Yamada.<sup>a,b</sup>

6

7

8 <sup>a</sup>*Department of Life Science, College of Science, Rikkyo University, Toshima-ku, Tokyo*  
9 *171-8501, Japan*

10 <sup>b</sup>*Research Center for Life Science, College of Science, Rikkyo University, Toshima-ku, Tokyo*  
11 *171-8501, Japan*

12 <sup>c</sup>*Department of Applied Chemistry, Faculty of Science and Engineering, Chuo University,*  
13 *Bunkyo-ku, Tokyo 112-8551, Japan*

14

15 Running Head: Mg<sup>2+</sup> suppresses defects caused by lack of ribosomal proteins

16

17 \*Corresponding author: Phone & Fax: +81-3-3895-4579; E-mail: [akanuma@rikkyo.ac.jp](mailto:akanuma@rikkyo.ac.jp),

18

19

20 Keywords: Ribosome, Ribosomal protein, Magnesium, *Bacillus subtilis*

21

22 **ABSTRACT**

23

24 Individually, the ribosomal proteins L1, L23, L36 and S6 are not essential for cell  
25 proliferation of *B. subtilis*, but the absence of any one of these ribosomal proteins causes a  
26 defect in the formation of the 70S ribosomes and a reduced growth rate. In mutant strains  
27 individually lacking these ribosomal proteins, the cellular  $Mg^{2+}$  content was significantly  
28 reduced. The deletion of YhdP, an exporter of  $Mg^{2+}$ , and overexpression of MgtE, the main  
29 importer of  $Mg^{2+}$ , increased the cellular  $Mg^{2+}$  content and restored the formation of 70S  
30 ribosomes in these mutants. The increase in the cellular  $Mg^{2+}$  content improved the growth  
31 rate of the  $\Delta rplA$  (L1) and the  $\Delta rplW$  (L23) mutant but did not restore those of the  $\Delta rpmJ$   
32 (L36) and the  $\Delta rpsF$  (S6) mutants. The lack of L1 caused a decrease in the production of  
33 Spo0A, the master regulator of sporulation, resulting in a decreased sporulation frequency.  
34 However, deletion of *yhdP* and overexpression of *mgtE* increased the production of Spo0A  
35 and partially restored the sporulation frequency in the  $\Delta rplA$  (L1) mutant. These results  
36 indicate that  $Mg^{2+}$  can partly complement the function of several ribosomal proteins,  
37 probably by stabilizing the conformation of the ribosome.

38

39

40 **IMPORTANCE**

41

42 We previously reported that an increase in the cellular  $Mg^{2+}$  content can suppress defects in  
43 70S ribosome formation and growth rate caused by the absence of ribosomal protein L34. In

44 the present study, we demonstrated that even in mutants lacking individual ribosomal  
45 proteins other than L34 (L1, L23, L36 and S6), an increase in the cellular  $Mg^{2+}$  content could  
46 restore the 70S ribosome formation. Moreover, the defect in sporulation caused by the  
47 absence of L1 was also suppressed by an increase in the cellular  $Mg^{2+}$  content. These  
48 findings indicate that at least part of the function of these ribosomal proteins can be  
49 complemented by  $Mg^{2+}$ , which is essential for all living cells.

50

51

## 52 **INTRODUCTION**

53

54 The bacterial ribosome (70S), which plays a central role in protein synthesis, is a complex  
55 macromolecule that is composed of small (30S) subunit and large (50S) subunits. The small  
56 subunit is comprised of the 16S rRNA and more than 20 proteins, whereas the large subunit is  
57 comprised of the 23S and 5S rRNAs and more than 30 proteins (1, 2). Protein synthesis by  
58 the ribosome, called translation, requires the coordinated action of these subunits. The small  
59 subunit associates with the mRNA and the anticodon stem-loop of the bound tRNA, and  
60 engages in ensuring the fidelity of translation by checking for correct pairing between the  
61 codon and anticodon (3-7). The large subunit associates with the acceptor arms of the tRNA  
62 and catalyzes the formation of a peptide bond between the amino acid attached to the tRNA  
63 in the A-site and the nascent peptide chain bound to the tRNA in the P-site (8, 9). The  
64 ribosomal proteins that constitute these subunits play important role(s) in translation. For  
65 instance, ribosomal protein L1, which is localized to the stalk region near the E-site (10, 11),

66 plays a critical role in the translocation of the newly deacylated tRNA from the P to the E site  
67 (12). Ribosomal protein L2 plays important roles in binding of the tRNA to the A and P sites,  
68 peptidyltransferase activity, and formation of the peptide bond (13-17). Therefore, the mature  
69 conformation of the 70S ribosomes is required for efficient translation activity. Although the  
70 ribosomal proteins are important in the translation processes as well as in the association of  
71 the ribosomal subunits (13, 18, 19), several genes encoding ribosomal protein can be deleted.  
72 In *Escherichia coli*, 22 of the 54 genes for ribosomal proteins are not individually essential  
73 for cell proliferation (20, 21). Similarly, in *Bacillus subtilis*, 22 of the 57 genes for ribosomal  
74 proteins can be individually deleted (22). The *rpmH* gene, encoding ribosomal protein L34,  
75 which is a component of the large subunit, is one of the nonessential genes. Mutants lacking  
76 L34 have a severe defect in the formation of the 70S ribosome and a reduced growth rate  
77 (22). However, we found that the defect in the formation of 70S ribosomes and the reduction  
78 in the growth late could be suppressed by an increase in the  $Mg^{2+}$  content in the cell (23).  
79 Magnesium ions are the most abundant divalent cations in living cells (24, 25), and are  
80 important for the maintenance of ribosome structure.  $Mg^{2+}$  is required for both stabilization  
81 of the secondary structure of rRNA and binding of the ribosomal proteins to the rRNA  
82 (26-28). The *in vitro* association of the 30S and 50S ribosomal subunits to form intact 70S  
83 ribosomes depends strongly on the concentration of  $Mg^{2+}$  (29-31). Therefore, we believe that  
84  $Mg^{2+}$  can partly complement the L34 function by stabilizing both the conformation of the  
85 50S subunit and the intersubunit bridges.

86 In the present study, to elucidate whether  $Mg^{2+}$  can also complement mutant strains  
87 lacking ribosomal proteins other than L34, we examined the effect of increasing the  $Mg^{2+}$

88 content in mutant strains individually lacking ribosomal proteins L1, L23, L36 and S6 on the  
89 formation of 70S ribosomes, the growth rate, and on sporulation.

90

91

## 92 **RESULTS**

93

94 **Reduction in the cellular  $Mg^{2+}$  content caused by lack of ribosomal proteins was**  
95 **restored by disruption of *yhdP* and overexpression of *mgtE*.**

96 The defect in the formation of 70S ribosomes caused by the absence of L34 could be  
97 suppressed by increasing the cellular  $Mg^{2+}$  content (23). To investigate the generality of the  
98 partial complementation of the ribosomal-protein function by  $Mg^{2+}$ , a disruption of *yhdP* and  
99 the multicopy plasmid pDGmgtE, which can induce the overexpression of *mgtE*, were  
100 introduced into mutants lacking individual ribosomal proteins L1, L23, L36 and S6. MgtE is  
101 the main importer of  $Mg^{2+}$  (32), whereas YhdP is probably an exporter of  $Mg^{2+}$  in *B. subtilis*  
102 (23). We previously reported that the absence of L34 (RpmH) caused a decrease in the  $Mg^{2+}$   
103 content in the cell, probably due to a reduced number of 70S ribosomes, and that the  $Mg^{2+}$   
104 content in the  $\Delta rpmH$  mutant was restored by disruption of *yhdP* and overexpression of *mgtE*  
105 (23). Similarly, the  $Mg^{2+}$  contents in the  $\Delta rplA$  (L1),  $\Delta rplW$  (L23) and  $\Delta rpmJ$  (L36) mutants  
106 were also significantly reduced (Fig. 1). However, the  $Mg^{2+}$  content in these three mutants  
107 was restored, albeit incompletely, by disruption of *yhdP* and overexpression of *mgtE* (Fig. 1).  
108 In this experiment, the cellular  $Mg^{2+}$  concentration was calculated by dividing the amount of  
109  $Mg^{2+}$  per cell by the cell volume. The cell volume of each mutant was estimated from the cell

110 size, which was measured by microscopic analysis, as described in Materials and Methods.  
111 However, the cell size of the  $\Delta rpsF$  (S6) mutant could not be defined, because the cellular  
112 morphology of the  $\Delta rpsF$  mutant was aberrantly filamentous (Fig. S1). Thus, in the  $\Delta rpsF$   
113 mutant, the relative  $Mg^{2+}$  amount per cell, when the  $Mg^{2+}$  amount of a cell in the parental  
114 strain was defined as 1, is shown in Fig. 1. Although a comparison of the  $Mg^{2+}$  content in the  
115  $\Delta rpsF$  mutants with that in the wild type was difficult, the  $Mg^{2+}$  content in the  $\Delta rpsF$  mutants  
116 was certainly increased by disruption of *yhdP* and overexpression of *mgtE*. It should be noted  
117 that the  $Mg^{2+}$  ions that were chelated in ribosomes and other enzymes were also detected by  
118 this method, because the cells were completely disrupted by sonication and proteins were  
119 denatured by acid treatment.

120

121 **The effect of increasing the cellular  $Mg^{2+}$  content of mutants lacking individual**  
122 **ribosomal proteins on the formation of 70S ribosomes and the growth rate.**

123 As shown in Fig. 2, the lack of individual ribosomal proteins (L1, L23, L36, S6) caused  
124 defects in the formation of 70S ribosomes that are consistent with our previous data (22). The  
125 defect in 70S-ribosome formation observed in these mutants was suppressed by disruption of  
126 *yhdP* and overexpression of *mgtE*, to varying degrees (Fig. 2). In all of the mutants  
127 investigated here, the amount of 70S ribosomes relative to the amount of dissociated subunits  
128 was restored by increasing the  $Mg^{2+}$  content in the cell. These results indicate that  $Mg^{2+}$  can  
129 suppress the defect in the formation of 70S ribosomes caused by the absence of several  
130 individual ribosomal proteins.

131 We next investigated the effect of the cellular  $Mg^{2+}$  content on the growth rate of the

132 mutants. We have reported that the slow growth observed in the  $\Delta rpmH$  (L34) mutant was  
133 suppressed by an increase in the  $Mg^{2+}$  content, probably due to the restoration of the amount  
134 of 70S ribosomes (23). A reduction in the growth rate was observed in the mutants lacking  
135 individual ribosomal proteins, which agrees with our previous results (22). As expected, in  
136 the  $\Delta rplA$  (L1) and  $\Delta rplW$  (L23) mutants, the growth rate was partially restored by disruption  
137 of *yhdP* and overexpression of *mgtE* (Fig. 3A and B, Table 1). When only *mgtE* was  
138 overexpressed in the  $\Delta rplA$  (L1) mutant, its effect on the growth rate was minimal (23). The  
139 combination of overexpression of *mgtE* and disruption of *yhdP*, however, increased the  
140 growth rate of the  $\Delta rplA$  (L1) mutant. In contrast, the growth rates of the  $\Delta rpmJ$  (L36) and  
141  $\Delta rpsF$  (S6) mutants were not significantly increased when the cellular  $Mg^{2+}$  content was  
142 increased (Fig. 3C and D, Table 1). Therefore, the increased formation of 70S ribosomes did  
143 not necessarily restore the growth rate of the mutants lacking individual ribosomal proteins.

144

145 **The increase in the cellular  $Mg^{2+}$  content suppresses the defect in sporulation caused by**  
146 **the absence of ribosomal protein L1.**

147 We previously found that the absence of ribosomal protein L1 causes a defect in sporulation  
148 (22). It should be note that this phenotype was not caused solely by the decreased growth  
149 rate, because the sporulation frequency of the  $\Delta rpmH$  mutant, which also showed a severe  
150 growth defect similar to that of the  $\Delta rplA$  (L1) mutant, was almost the same as that of the  
151 wild type (22). We therefore investigated whether the sporulation defect of the  $\Delta rplA$  (L1)  
152 mutant could be suppressed by  $Mg^{2+}$ . Consistent with our previous data, the  $\Delta rplA$  (L1)

153 mutant was severely defective in forming heat-resistant spores (the sporulation frequency  
154 was less than 0.01%) (Table 2). However, the sporulation frequency of the  $\Delta rplA$  (L1) mutant  
155 was significantly restored by disruption of *yhdP* and overexpression of *mgtE* (Table 2). In  
156 addition, the growth rate of the  $\Delta rplA$  (L1) mutant in sporulation medium was also restored  
157 by disruption of *yhdP* and overexpression of *mgtE* (Fig. 4A). These results indicate that  
158 increasing the cellular  $Mg^{2+}$  content can suppress not only the growth defect, but also the  
159 sporulation defect in the  $\Delta rplA$  (L1) mutant.

160 The restoration of spore formation by the  $\Delta rplA$  (L1) mutant prompted us to identify  
161 which stage of sporulation was affected by the absence of L1 and restoration by  $Mg^{2+}$ . At the  
162 initiation stage of *B. subtilis* sporulation, cells divide asymmetrically, and chromosomal  
163 DNA is concentrated in the forespore (33). In fact, asymmetric septation and concentration of  
164 chromosomal DNA were detected in the wild-type cells five h after inoculation in sporulation  
165 medium (Fig. S2). In contrast, in the  $\Delta rplA$  (L1) cells, asymmetric septation was not  
166 observed even 24 h after inoculation (Fig. S2). However, the disruption of *yhdP* and  
167 overexpression of *mgtE* helped formation of the asymmetric septum in the  $\Delta rplA$  (L1) cells  
168 (Fig. S2). We next examined the level of Spo0A in the  $\Delta rplA$  (L1) mutant. Phosphorylation of  
169 Spo0A, the master transcriptional regulator of sporulation, governs the decision to initiate  
170 sporulation (34-36). In wild-type cells, the level of Spo0A increased four hours after  
171 inoculation into sporulation medium, whereas Spo0A was barely detectible in  $\Delta rplA$  (L1)  
172 cells even 10 h after inoculation (Fig. 4B). The disruption of *yhdP* and overexpression of  
173 *mgtE* in the  $\Delta rplA$  (L1) cells increased the amount of Spo0A by 9 h after inoculation,



174 although the level of Spo0A remained lower than that in wild type (Fig. 4B). These results  
175 indicate that the defect in the initiation stage of sporulation caused by the absence of L1 can  
176 be at least partially suppressed by an increase in the  $Mg^{2+}$  content in the cell.

177

178

## 179 **DISCUSSION**

180

181 The cellular  $Mg^{2+}$  contents of the mutant strains individually lacking L1, L23, or L36 were  
182 reduced compared to that of wild type, while that of the  $\Delta rpsF$  (S6) mutant was difficult to  
183 calculate because of its filamentous cellular morphology (Fig. 1 and Fig. S1). The reduction  
184 in the amount of  $Mg^{2+}$  was probably caused by the lower amount of 70S ribosomes, which  
185 harbor more than 170  $Mg^{2+}$  ions per complex (37), and by a decrease in the amount of protein  
186 and RNA other than ribosomes that can chelate  $Mg^{2+}$ . In fact, we previously showed that the  
187 reduction in the cellular  $Mg^{2+}$  content correlated with the decrease in the amount of 70S  
188 ribosomes (23). On the other hand, the disruption of *yhdP* and overexpression of *mgtE*  
189 increased cellular  $Mg^{2+}$  content and restored the formation of 70S ribosomes in the mutants  
190 lacking individual ribosomal proteins tested here (Fig. 2). Although the absence of L34  
191 causes ribosomal protein L16 to dissociate from the 50S subunit, the increase in the  $Mg^{2+}$   
192 content restores the binding of L16 to the 50S subunit, indicating that  $Mg^{2+}$  can stabilize the  
193 conformation of 50S subunits lacking L34 (23). Likewise, stabilization of the conformation  
194 of each subunit as well as inter bridges between the subunits by  $Mg^{2+}$  probably restored 70S  
195 formation in the mutants lacking individual ribosomal proteins tested here (L1, L23, L36 and

196 S6).

197 The increase in the 70S ribosome formation restored cellular translational activity that  
198 may have resulted in the suppression of the defect in the growth rate of the  $\Delta rplA$  (L1) and  
199  $\Delta rplW$  (L23) mutants (Fig. 3 and Table 1). However, the restoration of growth rate of these  
200 mutants was only partial. Possible reasons for this partial restoration of the growth are (i) an  
201 incomplete restoration of the normal amount of 70S ribosomes, and (ii) functions of the  
202 ribosomal proteins other than in stabilizing the 70S ribosomes could not be complemented by  
203  $Mg^{2+}$ . Ribosomal protein L1 plays a critical role in the translocation of the newly deacylated  
204 tRNA from the P to the E site (12), while ribosomal protein L23, which is located at the  
205 polypeptide exit channel of the large subunit, tethers trigger factor to the ribosome (38).  
206 Trigger factor, which is the first molecular chaperone interacting with newly synthesized  
207 polypeptides by the ribosome, promotes protein folding (39-41). The functions of these  
208 ribosomal proteins are probably essential for efficient growth. In contrast to mutants lacking  
209 L1 or L23, the growth rates of the  $\Delta rpmJ$  (L36) and  $\Delta rpsF$  (S6) mutants were not  
210 significantly increased when the  $Mg^{2+}$  content was increased, although 70S ribosome  
211 formation was restored to near wild-type levels (Fig. 2 and Fig. 3). Although the detailed  
212 functions of L36 and S6 in protein synthesis are unknown, their role(s) in translation or other  
213 function(s) do not appear to be complemented by  $Mg^{2+}$ . In addition, the filamentous  
214 morphology of cells caused by the absence of S6 was not repaired by increasing the cellular  
215  $Mg^{2+}$  content.

216 The increase in the cellular  $Mg^{2+}$  content suppressed the defect not only of 70S ribosome  
217 formation, but also the sporulation defect of the  $\Delta rplA$  (L1) mutant (Table 2). Although

218 Spo0A, the master regulator of sporulation, was undetectable in the  $\Delta rplA$  (L1) mutant,  
219 Spo0A was clearly produced when the cellular  $Mg^{2+}$  content was increased (Fig. 4), and  
220 resulted in the restoration of sporulation frequency of the  $\Delta rplA$  (L1) mutant. The  
221 phosphorylated form of Spo0A activates expression of sporulation genes as well as its own  
222 gene via a positive feedback loop (42). Phosphorylation of Spo0A is achieved by a  
223 multicomponent phosphorelay involving at least three kinases called KinA, KinB, and KinC  
224 (33, 35). KinA and KinB phosphorylate Spo0F, and phosphorylated Spo0F transfers the  
225 phosphoryl group to Spo0B. Finally, Spo0A receives a phosphoryl group from  
226 phosphorylated Spo0B (43). In addition, KinC can directly phosphorylate Spo0A without the  
227 Spo0F and Spo0B phosphorelay (33). Inversely, phosphorylated Spo0F and Spo0A can be  
228 dephosphorylated by phosphatases such as Spo0E (33). It is likely that an inhibition of the  
229 multicomponent phosphorelay, and/or the dephosphorylation of Spo0F and Spo0A by the  
230 phosphatases was caused by the lack of L1, and it could be suppressed by an increase in the  
231  $Mg^{2+}$  content. The improved Spo0A activation in the  $\Delta rplA$  (L1) mutant by  $Mg^{2+}$  was  
232 probably not due to the complementation of an extraribosomal function of L1, but to  
233 restoration of the amount of 70S ribosomes and/or an increase in the cellular translational  
234 activity.

235 In the present study, we demonstrated that the defect in the formation of 70S ribosomes as  
236 well as in the sporulation caused by lack of individual ribosomal proteins can be suppressed  
237 by increasing the cellular  $Mg^{2+}$  content.  $Mg^{2+}$  plays a crucial role not only in the ribosome but  
238 also in numerous biological processes and cellular functions, such as the activation and  
239 catalytic reactions of hundreds of enzymes, utilization of ATP, and maintenance of genomic

240 stability (44, 45). Clarifying the relationship between the ribosome and  $Mg^{2+}$ , both of which  
241 are essential to living cells, is important for understanding cellular function. It has been  
242 suggested that the sizes of ribosomal proteins have increased during evolution to  
243 complement the function of the rRNA, which originally acted as a ribozyme (46, 47). From  
244 another point of view, increasing of the sizes of ribosomal proteins and/or binding of  
245 ribosomal proteins to the ribosome during evolution can be considered to complement the  
246  $Mg^{2+}$  function in the ribosome, because in the ribosome, the relative abundance of  $Mg^{2+}$  is  
247 decreased whereas that of ribosomal proteins is increased (47, 48). Further investigation to  
248 reveal the mechanism of complementation of the ribosomal-protein function by  $Mg^{2+}$  may  
249 provide important information about the evolution of the ribosome.

250

251

## 252 **MATERIALS AND METHODS**

253

254 **Media and culture conditions.** LB medium (49), LB agar, and 2×Schaeffer's sporulation  
255 medium supplemented with 0.1% glucose (2×SG) (50) were used. The culture conditions and  
256 media for preparing competent cells have been described previously (51). When required, 5  
257  $\mu\text{g ml}^{-1}$  chloramphenicol, 5  $\mu\text{g ml}^{-1}$  kanamycin and 1 mM  
258 isopropyl- $\beta$ -D-thiogalactopyranoside (IPTG) were added to the media. Growth curves of *B.*  
259 *subtilis* cells were generated by automatically measuring the  $OD_{660}$  value of each culture  
260 every 5 min using a TVS062CA incubator (ADVANTEC).

261 **Bacterial strains.** All of the *B. subtilis* strains used in this study were isogenic with *B.*

262 *subtilis* strain 168 *trpC2*. The  $\Delta rplA::cat$ ,  $\Delta rplW::cat$ ,  $\Delta rpmJ::cat$  and  $\Delta rpsF::cat$  strains,  
263 which were constructed by replacing the open reading frame of each gene with a  
264 promoterless *cat* gene lacking a Rho-independent terminator sequence, were described  
265 previously (22). Chromosomal DNA extracted from the  $\Delta rplA::cat$ ,  $\Delta rplW::cat$ ,  $\Delta rpmJ::cat$   
266 and  $\Delta rpsF::cat$  was used to transform the strain harboring  $\Delta yhdP::erm$  and the plasmid  
267 pDGmgtE, which carries the *mgtE* gene under the control of an IPTG-inducible Pspac  
268 promoter (23), and the transformants were selected on the basis of their  
269 chloramphenicol-resistant phenotype.

270 **Measurement of the cellular  $Mg^{2+}$  content.** The cellular  $Mg^{2+}$  content was measured as  
271 described previously (23). Briefly, *B. subtilis* cells were grown in LB medium to exponential  
272 phase and harvested. Simultaneously, viable cells were counted by plating the culture on LB  
273 agar plates. The cells were resuspended in lysis buffer and disrupted by sonication, and then  
274 the pH of the crude extract was adjusted to approximately 3.0 with hydrochloric acid in order  
275 to denature the proteins. The amount of  $Mg^{2+}$  in the cell lysate was measured with a Metallo  
276 Assay Kit for magnesium (Metallogenics). The  $Mg^{2+}$  content per cell was calculated by  
277 dividing the amount of  $Mg^{2+}$  in the crude extract by the number of viable cells. The  
278 concentration of  $Mg^{2+}$  was calculated by assuming that a *B. subtilis* cell is a cylinder. To  
279 measure the cell size (radius and length), microscopic images were analyzed by MicrobeJ, an  
280 ImageJ plug-in (52). The mean size of >30 cells was used for the calculation.

281 **Sucrose density gradient sedimentation analysis.** *B. subtilis* cells were grown in LB  
282 medium at 37°C with shaking to exponential phase ( $OD_{600} \sim 0.4$ ) and harvested. The sucrose  
283 density gradient sedimentation analysis was performed as described previously (22). Briefly,

284 the cells were disrupted by passage through a French pressure cell and cell debris was  
285 removed by centrifugation. Aliquots of extract were layered onto 10–40% sucrose density  
286 gradients, which were subjected to centrifugation at 4°C for 17.5 h at 65,000 ×g (Hitachi  
287 P40ST rotor). Samples were collected with a Piston Gradient Fractionator (BioComp), and  
288 absorbance profiles were monitored at 254 nm using a Bio-Mini UV Monitor (ATTO, Japan).  
289 When normalizing the applied volume by the total absorbance at 260 nm, 10 A<sub>260</sub> units of  
290 crude extract per tube were used.

291 **Sporulation assay.** *B. subtilis* cells were grown in 2× SG medium for 24 h at 37°C with  
292 shaking. Heat-resistant spores were counted by heating the cells at 80°C for 10 min, plating  
293 them on LB agar plates, and then incubating the plates at 37°C for 24 h.

294 **Microscopic imaging.** *B. subtilis* cells were grown in 2× SG medium at 37°C with  
295 shaking. At the indicated times, 500 µl of the culture was removed and subjected to  
296 centrifugation at 12,000 × g for 1 min. The cell pellet was resuspended in 40 µl of culture  
297 supernatant and then FM4-64 (Invitrogen) and DAPI (Wako Pure Chemical Industries) were  
298 added to final concentrations of 10 µg/ml and 5 µg/ml, respectively. The cell suspension was  
299 mounted on a microscope slide, coated with poly-L-lysine to fix the cells, and differential  
300 interference contrast and fluorescence images were obtained with a LSM800, a confocal  
301 fluorescence microscope (Carl Zeiss).

302 **Western blot analysis.** Western blot analysis was performed according to a previously  
303 described method (53). Aliquots (15 µg of protein) of crude cell extracts were loaded onto a  
304 sodium dodecyl sulfate polyacrylamide gel (12%) and transferred to a PVDF membrane  
305 (Millipore Co., Japan). This membrane was then used in the Western blot assay using antisera

306 (1:10,000 dilution) against Spo0A (54).

307

308 **ACKNOWLEDGEMENTS**

309 This work was supported in parts by Grants-in-Aid for Scientific Research (C) (26450101  
310 and 15K07013 to G. A. and Y. K.-Y., respectively), Grant-in-Aid for Young Scientists (B)  
311 (17K15253 and 23770157 to G. A. and Y. K.-Y., respectively) and Strategic Research  
312 Foundation Grant-aided Project for Private Universities (S1201003 to F. K. and Y. K.-Y.)  
313 from the Ministry of Education, Culture, Sports, Science, and Technology of Japan.

314 **REFERENCES**

- 315 **1. Kurland CG.** 1972. Structure and function of the bacterial ribosome. *Annu. Rev.*  
316 *Biochem.* **41**:377–408.
- 317 **2. Nomura M.** 1970. Bacterial ribosome. *Bacteriol. Rev.* **34**:228–277.
- 318 **3. Jenner L, Demeshkina N, Yusupova G, Yusupov M.** 2010. Structural rearrangements of  
319 the ribosome at the tRNA proofreading step. *Nat. Struct. Mol. Biol.* **17**:1072–1078.
- 320 **4. Ogle JM, Brodersen DE, Clemons WM Jr, Tarry MJ, Carter AP, Ramakrishnan V.**  
321 2001. Recognition of cognate transfer RNA by the 30S ribosomal subunit. *Science*  
322 **292**:897–902.
- 323 **5. Schluenzen F, Tocilj A, Zarivach R, Harms J, Gluehmann M, Janell D, Bashan A,**  
324 **Bartels H, Agmon I, Franceschi F, Yonath A.** 2000. Structure of functionally activated  
325 small ribosomal subunit at 3.3 Å resolution. *Cell* **102**:615–623.
- 326 **6. Wimberly BT, Brodersen DE, Clemons WM Jr, Morgan-Warren RJ, Carter AP,**  
327 **Vonrhein C, Hartsch T, Ramakrishnan V.** 2000 Structure of the 30S ribosomal subunit.  
328 *Nature* **407**:327–339.
- 329 **7. Yusupova GZ, Yusupov MM, Cate JH, Noller HF.** 2001. The path of messenger RNA  
330 through the ribosome. *Cell* **106**:233–241.
- 331 **8. Ban N, Nissen P, Hansen J, Moore PB, Steitz TA.** 2000. The complete atomic structure  
332 of the large ribosomal subunit at 2.4 Å resolution. *Science* **289**:905–920.
- 333 **9. Nissen P, Hansen J, Ban N, Moore PB, Steitz TA.** 2000. The structural basis of ribosome  
334 activity in peptide bond synthesis. *Science.* **289**:920–930.
- 335 **10. Yusupov MM, Yusupova GZ, Baucom A, Lieberman K, Earnest TN, Cate JH,**



- 336 **Noller HF.** 2001. Crystal structure of the ribosome at 5.5 Å resolution. *Science* **292**:883–  
337 896.
- 338 **11. Agrawal RK, Lata RK, Frank J.** 1999. Conformational variability in *Escherichia coli*  
339 70S ribosome as revealed by 3D cryo-electron microscopy. *Int. J. Biochem. Cell. Biol.*  
340 **31**:243–254.
- 341 **12. Fei J, Kosuri P, MacDougall DD, Gonzalez RL.** 2008. Coupling of ribosomal L1 stalk  
342 and tRNA dynamics during translation elongation. *Mol. Cell* **30**:348–359.
- 343 **13. Diedrich G, Spahn CM, Stelzl U, Schafer MA, Wooten T, Bochkariov DE,**  
344 **Cooperman BS, Traut RR, Nierhaus KH.** 2000. Ribosomal protein L2 is involved in  
345 the association of the ribosomal subunits, tRNA binding to A and P sites and peptidyl  
346 transfer. *EMBO J.* **19**:5241–5250.
- 347 **14. Khaitovich P, Mankin AS, Green R, Lancaster L, Noller HF.** 1999. Characterization  
348 of functionally active subribosomal particles from *Thermus aquaticus*. *Proc. Natl. Acad.*  
349 *Sci. USA* **96**:85–90.
- 350 **15. Schulze H, Nierhaus KH.** 1982. Minimal set of ribosomal components for  
351 reconstitution of the peptidyltransferase activity. *EMBO J.* **1**:609–613.
- 352 **16. Uhlein M, Weglöhner W, Urlaub H, Wittmann-Liebold B.** 1998. Functional  
353 implications of ribosomal protein L2 in protein biosynthesis as shown by *in vivo*  
354 replacement studies. *Biochem. J.* **331**:423–430.
- 355 **17. Willumeit R, Forthmann S, Beckmann J, Diedrich G, Ratering R, Stuhrmann HB,**  
356 **Nierhaus KH.** 2001. Localization of the protein L2 in the 50S subunit and the 70S *E. coli*  
357 ribosome. *J. Mol. Biol.* **305**:167–177.

- 358 **18. Teraoka H, Nierhaus KH.** 1978. Protein L16 induces a conformational change when  
359 incorporated into a L16-deficient core derived from *Escherichia coli* ribosomes. FEBS  
360 Lett. **88**:223–226.
- 361 **19. Suzuki S, Tanigawa O, Akanuma G, Nanamiya H, Kawamura F, Tagami K,**  
362 **Nomura N, Kawabata T, Sekine Y.** 2014. Enhanced expression of *Bacillus subtilis*  
363 *yaaA* can restore both the growth and sporulation defects caused by mutation of *rplB*,  
364 encoding ribosomal protein L2. Microbiology **160**:1040–1053.
- 365 **20. Baba T, Ara T, Hasegawa M, Takai Y, Okumura Y, Baba M, Datsenko KA, Tomita**  
366 **M, Wanner BL, Mori H.** 2006. Construction of *Escherichia coli* K-12 in-frame,  
367 single-gene knockout mutants: the Keio collection. Mol. Syst. Biol. 2: 2006.0008.
- 368 **21. Shoji S, Dambacher CM, Shajani Z, Williamson JR, Schultz PG.** 2011. Systematic  
369 chromosomal deletion of bacterial ribosomal protein genes. J. Mol. Biol. **413**:751–761.
- 370 **22. Akanuma G, Nanamiya H, Natori Y, Yano K, Suzuki S, Omata S, Ishizuka M,**  
371 **Sekine Y, Kawamura F.** 2012. Inactivation of ribosomal protein genes in *Bacillus*  
372 *subtilis* reveals importance of each ribosomal protein for cell proliferation and cell  
373 differentiation. J. Bacteriol. **194**:6282–6291.
- 374 **23. Akanuma G, Kobayashi A, Suzuki S, Kawamura F, Shiwa Y, Watanabe S,**  
375 **Yoshikawa H, Hanai R, Ishizuka M.** 2014. Defect in the formation of 70S ribosomes  
376 caused by lack of ribosomal protein L34 can be suppressed by magnesium. J Bacteriol.  
377 **196**:3820–3830.
- 378 **24. Maguire ME, Cowan JA.** 2002. Magnesium chemistry and biochemistry. Biometals **15**:  
379 203–210.

- 380 **25. Wacker WE.** 1969. The biochemistry of magnesium. *Ann. N Y Acad. Sci.* **162**: 717–726.
- 381 **26. Drygin D, Zimmermann RA.** 2000. Magnesium ions mediate contacts between  
382 phosphoryl oxygens at positions 2122 and 2176 of the 23S rRNA and ribosomal protein  
383 L1. *RNA* **6**:1714–1726.
- 384 **27. Klein DJ, Moore PB, Steitz TA.** 2004. The contribution of metal ions to the structural  
385 stability of the large ribosomal subunit. *RNA* **10**:1366–1379.
- 386 **28. Petrov AS, Bernier CR, Hsiao C, Okafor CD, Tannenbaum E, Stern J, Gaucher E,**  
387 **Schneider D, Hud NV, Harvey SC, Williams LD.** 2012. RNA-magnesium-protein  
388 interactions in large ribosomal subunit. *J. Phys. Chem. B.* **116**:8113–8120.
- 389 **29. Blaha G, Burkhardt N, Nierhaus KH.** 2002. Formation of 70S ribosomes: large  
390 activation energy is required for the adaptation of exclusively the small ribosomal  
391 subunit. *Biophys. Chem.* **96**:153–161.
- 392 **30. Liiv A, O'Connor M.** 2006. Mutations in the intersubunit bridge regions of 23 S rRNA.  
393 *J. Biol. Chem.* **281**:29850–29862.
- 394 **31. Tissieres A, Watson JD, Schlessinger D, Hollingworth BR.** 1959. Ribonucleoprotein  
395 particles from *Escherichia coli*. *J. Mol. Biol.* **1**:221–233.
- 396 **32. Wakeman CA, Goodson JR, Zacharia VM, Winkler WC.** 2014. Assessment of the  
397 Requirements for Magnesium Transporters in *Bacillus subtilis*. *J. Bacteriol.* **196**:1206–  
398 1214.
- 399 **33. Higgins D, Dworkin J.** 2012 Recent progress in *Bacillus subtilis* sporulation. *FEMS*  
400 *Microbiol. Rev.* **36**:131–148.
- 401 **34. Hoch JA.** 1993. Regulation of the phosphorelay and the initiation of sporulation in

- 402 *Bacillus subtilis*. Annu. Rev. Microbiol. **47**:441–465.
- 403 **35. Stephenson K, Hoch JA.** 2002. Evolution of signalling in the sporulation phosphorelay.  
404 Mol. Microbiol. **46**:297–304.
- 405 **36. Molle V, Fujita M, Jensen ST, Eichenberger P, Gonzalez-Pastor JE, Liu JS, Losick**  
406 **R.** 2003. The Spo0A regulon of *Bacillus subtilis*. Mol. Microbiol. **50**:1683–1701.
- 407 **37. Schuwirth BS, Borovinskaya MA, Hau CW, Zhang W, Vila-Sanjurjo A, Holton JM,**  
408 **Cate JH.** 2005. Structures of the bacterial ribosome at 3.5 Å resolution. Science  
409 **310**:827–834.
- 410 **38. Kramer G, Rauch T, Rist W, Vorderwulbecke S, Patzelt H, Schulze-Specking A,**  
411 **Ban N, Deuerling E, Bukau B.** 2002. L23 protein functions as a chaperone docking site  
412 on the ribosome. Nature **419**:171–174.
- 413 **39. Merz F, Boehringer D, Schaffitzel C, Preissler S, Hoffmann A, Maier T, Rutkowska**  
414 **A, Lozza J, Ban N, Bukau B, Deuerling E.** 2008. Molecular mechanism and structure  
415 of trigger factor bound to the translating ribosome. EMBO J. **27**:1622–1632.
- 416 **40. Hartl FU, Hayer-Hartl M.** 2009. Converging concepts of protein folding *in vitro* and *in*  
417 *vivo*. Nat. Struct. Mol. Biol. **16**:574–581.
- 418 **41. Hoffmann A, Bukau B, Kramer G.** 2010. Structure and function of the molecular  
419 chaperone Trigger Factor. Biochim. Biophys. Acta. **1803**(6):650–661.
- 420 **42. Hoch JA.** 1991. *spo0* genes, the phosphorelay, and the initiation of sporulation. In  
421 *Bacillus subtilis* and other Grampositive bacteria: Biochemistry, physiology, and  
422 molecular genetics (eds. A.L. Sonenshein et al.), pp. 747–755. American Society for  
423 Microbiology, Washington, D.C

- 424 **43. Burbulys D, Trach KA, Hoch JA.** 1991 Initiation of sporulation in *B. subtilis* is  
425 controlled by a multicomponent phosphorelay. *Cell* **64**:545–552.
- 426 **44. Cowan JA.** 2002. Structural and catalytic chemistry of magnesium dependent enzymes.  
427 *Biometals* **15**:225–235
- 428 **45. Hartwig A.** 2001. Role of magnesium in genomic stability. *Mutat. Res.* **475**:113–121.
- 429 **46. Bokov K, Steinberg SV.** 2009. A hierarchical model for evolution of 23S ribosomal  
430 RNA. *Nature* **457**:977–980.
- 431 **47. Wachowius F, Attwater J, Holliger P.** 2017. Nucleic acids: function and potential for  
432 abiogenesis. *Q. Rev. Biophys.* 50:e4. doi: 10.1017/S0033583517000038.
- 433 **48. Hsiao C, Mohan S, Kalahar BK, Williams L D.** 2009. Peeling the onion: ribosomes are  
434 ancient molecular fossils. *Molecular Biology and Evolution* **26**:2415–2425.
- 435 **49. Sambrook J, Fritsch EF, Maniatis T.** 1989. *Molecular Cloning: A Laboratory Manual*,  
436 2nd ed., Cold Spring Harbor Laboratory Press, Cold Spring Harbor, NY.
- 437 **50. Leighton TJ, Doi RH.** 1971. The stability of messenger ribonucleic acid during  
438 sporulation in *Bacillus subtilis*. *J. Biol. Chem.* **246**:3189–3195.
- 439 **51. Ashikaga S, Nanamiya H, Ohashi Y, Kawamura F.** 2000. Natural genetic competence  
440 in *Bacillus subtilis* natto OK2. *J. Bacteriol.* **182**:2411–2415.
- 441 **52. Jiang C, Brown PJ, Ducret A, Brun YV.** 2014. Sequential evolution of bacterial  
442 morphology by co-option of a developmental regulator. *Nature* **506**:489–493.
- 443 **53. Nanamiya H, Shiomi E, Ogura M, Tanaka T, Asai K, Kawamura F.** 2003.  
444 Involvement of ClpX protein in the post-transcriptional regulation of a competence  
445 specific transcription factor, ComK protein, of *Bacillus subtilis*. *J Boichem (Tokyo)* **133**:

446 295–302.

447 **54. Nanamiya H, Ohashi Y, Asai K, Moriya S, Ogasawara N, Fujita M, Sadaie Y,**

448 **Kawamura F.** 1998. ClpC regulates the fate of a sporulation initiation sigma factor,  $\sigma^H$

449 protein, in *Bacillus subtilis* at elevated temperatures. *Mol. Microbiol.* **29**:505–513.

450

451 **Figure legends**

452

453 **Fig. 1.** Reduction in the  $Mg^{2+}$  content in mutant strains lacking individual ribosomal proteins  
454 and partial restoration by disruption of *yhdP* and overexpression of *mgtE*. The  $Mg^{2+}$  content  
455 per cell in exponential phase, which was measured as described in the Materials and  
456 Methods, is shown. In the case of the  $\Delta rpsF$  (S6) mutant, the relative amount of  $Mg^{2+}$  per cell  
457 is shown (see text for details). White bars indicate the wild type and each mutant lacking  
458 individual ribosomal proteins. Gray bars indicate the results when *yhdP* was disrupted and  
459 *mgtE* was overexpressed. The means of three independent experiments are shown. Error bars  
460 indicate standard deviations.

461

462 **Fig. 2.** Defect in 70S ribosome formation in the absence of each ribosomal protein and its  
463 suppression by the disruption of *yhdP* and overexpression of *mgtE*. Crude cell extracts were  
464 sedimented through a 10–40% sucrose gradient as described in the Materials and Methods.  
465 The 30S, 50S, and 70S peaks are indicated in each individual profile. The term ‘/ pDGmgtE’  
466 indicates the overexpression of *mgtE* in the mutant cells.

467

468 **Fig. 3.** Effects of the increase in cellular  $Mg^{2+}$  content on the growth rate of the mutant strains  
469 lacking individual ribosomal proteins. Cells were grown in LB at 37°C, and the optical  
470 density at 660 nm was measured. Growth curves of wild type and each mutant lacking  
471 individual ribosomal proteins are shown using black solid lines and gray solid lines,  
472 respectively. Growth curves of each mutant in which *yhdP* was disrupted and *mgtE* was

473 overexpressed are shown by gray dotted lines.

474

475 **Fig. 4.** Reduction in the growth rate and in the production of Spo0A caused by lack of L1 and  
476 their suppression by the disruption of *yhdP* and overexpression of *mgtE*. (A) Cells were  
477 grown in sporulation medium (2×SG) at 37°C, and the optical density at 660 nm was  
478 measured. Growth curves of wild type and the  $\Delta rplA$  (L1) mutant are shown using black and  
479 gray solid lines, respectively. The growth curve of the L1 mutant in which *yhdP* was  
480 disrupted and *mgtE* was overexpressed is shown by a gray dotted line. (B) Cells were grown  
481 in sporulation medium at 37°C, and were collected at the indicated times. Crude cell extracts  
482 were subjected to western blot analysis using antisera against the Spo0A. The term ‘/  
483 pDGmgtE’ indicates the overexpression of *mgtE* in the mutant cells.



Table 1. Doubling times (min) of mutants lacking ribosomal proteins.

| Strain              | Parental       | $\Delta yhdP/pDGmgtE$ |
|---------------------|----------------|-----------------------|
| wt                  | 21.4 $\pm$ 1.4 |                       |
| $\Delta rplA$ (L1)  | 67.7 $\pm$ 1.7 | 54.6 $\pm$ 0.49       |
| $\Delta rplW$ (L23) | 56.7 $\pm$ 1.9 | 37.0 $\pm$ 2.4        |
| $\Delta rpmJ$ (L36) | 43.3 $\pm$ 1.3 | 41.2 $\pm$ 0.54       |
| $\Delta rpsF$ (S6)  | 38.2 $\pm$ 1.1 | 36.4 $\pm$ 0.49       |

Means of three independent experiments with  $\pm$  SD are shown.

Table 2. Restoration of sporulation frequency of the  $\Delta L1$  mutant by  $Mg^{2+}$

| Strain                            | C.f.u. ml <sup>-1</sup> * |                   | Frequency (%)*                 |
|-----------------------------------|---------------------------|-------------------|--------------------------------|
|                                   | Total                     | Spores            |                                |
| wt                                | $6.4 \times 10^8$         | $5.8 \times 10^8$ | $90 \pm 7.9$                   |
| $\Delta L1$                       | $1.6 \times 10^8$         | $2.3 \times 10^2$ | $1.7 (\pm 1.2) \times 10^{-4}$ |
| $\Delta L1 \Delta yhdP / pDGmgtE$ | $3.1 \times 10^8$         | $7.5 \times 10^7$ | $25 \pm 4.7$                   |

\*Means of three independent experiments ( $\pm$  SD for sporulation frequency).

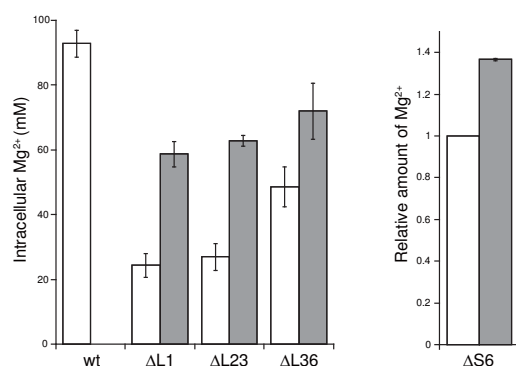

**Fig. 1.** Reduction in the Mg<sup>2+</sup> content in mutant strains lacking individual ribosomal proteins and partial restoration by disruption of *yhdP* and overexpression of *mgtE*. The Mg<sup>2+</sup> content per cell in exponential phase, which was measured as described in the Materials and Methods, is shown. In the case of the  $\Delta rpsF$  (S6) mutant, the relative amount of Mg<sup>2+</sup> per cell is shown (see text for details). White bars indicate the wild type and each mutant lacking individual ribosomal proteins. Gray bars indicate the results when *yhdP* was disrupted and *mgtE* was overexpressed. The means of three independent experiments are shown. Error bars indicate standard deviations.

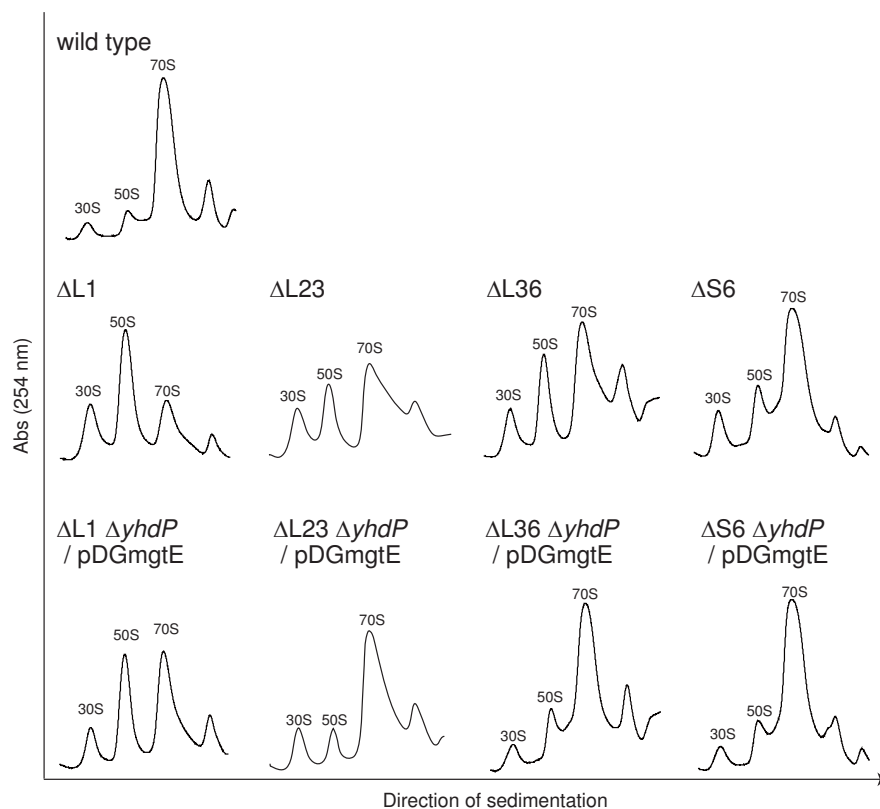

**Fig. 2.** Defect in 70S ribosome formation in the absence of each ribosomal protein and its suppression by the disruption of *yhdP* and overexpression of *mgtE*. Crude cell extracts were sedimented through a 10–40% sucrose gradient as described in the Materials and Methods. The 30S, 50S, and 70S peaks are indicated in each individual profile. The term ‘/ *pDGmgtE*’ indicates the overexpression of *mgtE* in the mutant cells.

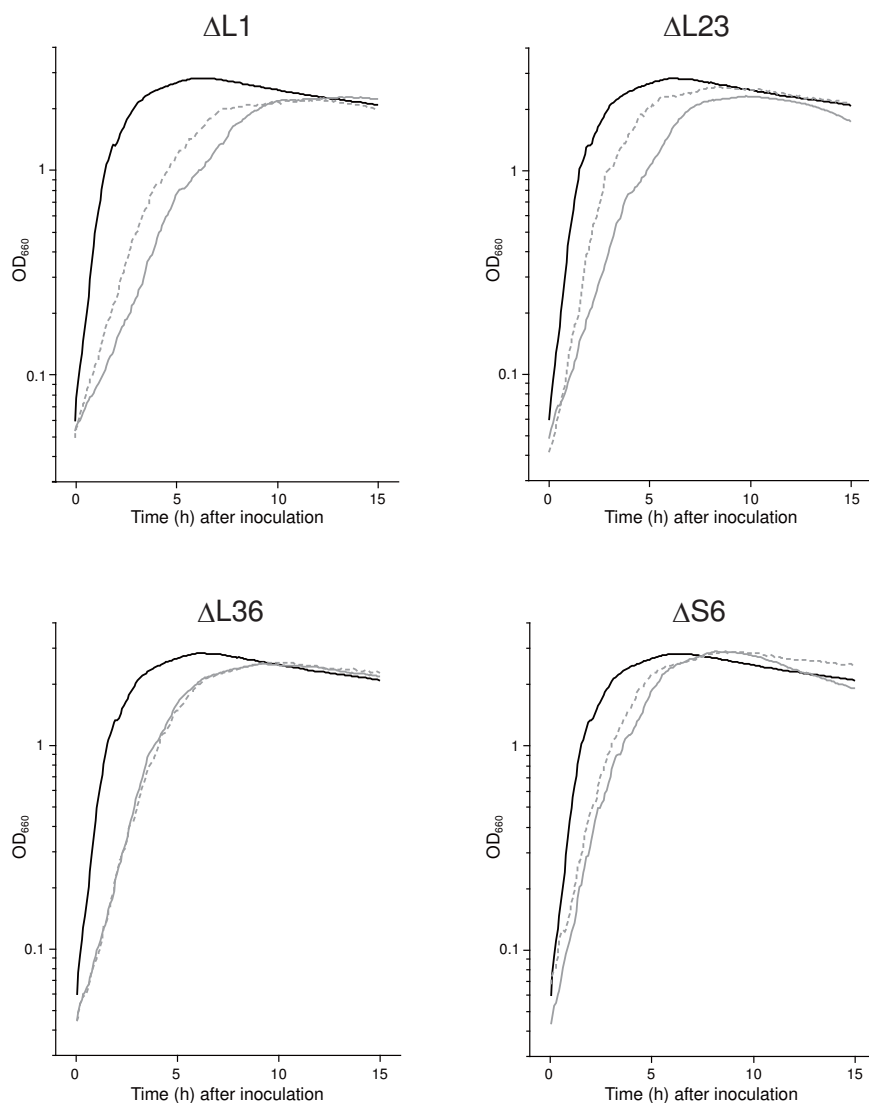

**Fig. 3.** Effects of the increase in cellular  $Mg^{2+}$  content on the growth rate of the mutant strains lacking individual ribosomal proteins. Cells were grown in LB at  $37^{\circ}C$ , and the optical density at 660 nm was measured. Growth curves of wild type and each mutant lacking individual ribosomal proteins are shown using black solid lines and gray solid lines, respectively. Growth curves of each mutant in which *yhdP* was disrupted and *mgtE* was overexpressed are shown by gray dotted lines.

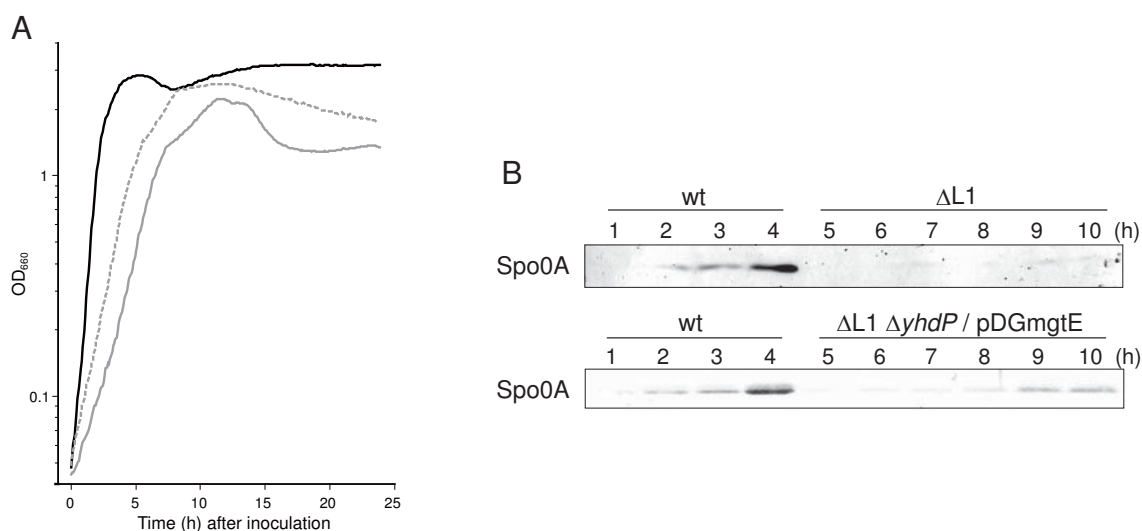

**Fig. 4.** Reduction in the growth rate and in the production of Spo0A caused by lack of L1 and their suppression by the disruption of *yhdP* and overexpression of *mgtE*. (A) Cells were grown in sporulation medium (2×SG) at 37°C, and the optical density at 660 nm was measured. Growth curves of wild type and the  $\Delta rplA$  (L1) mutant are shown using black and gray solid lines, respectively. The growth curve of the L1 mutant in which *yhdP* was disrupted and *mgtE* was overexpressed is shown by a gray dotted line. (B) Cells were grown in sporulation medium at 37°C, and were collected at the indicated times. Crude cell extracts were subjected to western blot analysis using antisera against the Spo0A. The term ‘/ pDGmgtE’ indicates the overexpression of *mgtE* in the mutant cells.
